# Supplementary material for: Trends in racial and ethnic discrimination in hiring in six Western countries
Source: PubMed Central journal article supplement — Proc Natl Acad Sci U S A. 2023 Jan 31;120(6):e2212875120. doi: 10.1073/pnas.2212875120 (PMC9963383; doi:10.1073/pnas.2212875120), 2023-01-31
Supplement: pnas.2212875120.sapp.pdf [file pnas.2212875120.sapp.pdf]

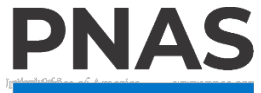

**Supporting Information for**  
Trends in Racial and Ethnic Discrimination in Hiring in Six Western  
Countries

Lincoln Quillian\* and John J. Lee

Lincoln Quillian  
E-mail: [l-quillian@northwestern.edu](mailto:l-quillian@northwestern.edu)

**This PDF file includes:**

Supporting text: Appendices A to D  
Figures S1 to S3  
Tables S1 to S11  
SI References

## Supporting Information Text

Some parts of the procedures described in the appendices below reprise text from Quillian et al. (1) and Quillian et al. (2)

### Appendix A. Study Search Methods and Coding

*Study Search:* Our search for studies included the methods of bibliographic search, citation search, and an e-mail request of authors of field experiments.

Our bibliographic search covered the following bibliographic databases and working paper repositories: Thomson's Web of Science (Social Science Citation Index), ProQuest Sociological Abstracts, ProQuest Dissertations and Theses, Lexis Nexis, Google Scholar, and NBER working papers. We searched for some combination of "field experiment" or "audit study" or "correspondence study" and sometimes included the term "discrimination," with some variation depending on the search functions of the database. To improve our coverage of non-English publications, we also searched two French-language indexes, Cairn.info and Persée; two international sources: IZA discussion papers, a German working paper archive; and ILO International Migration Papers. Finally, we conducted a search with Italian, Spanish, Portuguese and Dutch translations of the search terms and other terms frequently used in these languages to describe field experiments in hiring discrimination in Google Scholar. The search was first performed in March 2014 and repeated in August and September 2014 and in November 2015. We conducted searches in Italian, Spanish, Portuguese, and Dutch in November 2015 and February 2016. These searches were conducted by colleagues or research assistants fluent in the language of the search.

Our second technique for identifying relevant studies relied on citation search. Working from the initial set of studies located through bibliographic search, we examined the bibliographies of all review articles and eligible audit studies to find additional field experiments of hiring discrimination.

The last technique employed was an e-mail request to authors of existing field experiments of discrimination. From our list of audit studies identified by bibliographic and citation searches, we compiled a list of e-mail addresses of authors of existing field experiments of discrimination. We added the e-mail addresses of several well-known experts on field experiments, notably authors of literature review articles on field experiments. Our e-mail request asked for citations or copies of experimental field studies of discrimination that were published, unpublished, or ongoing. We also asked that the authors refer us to other researchers who may have recent or ongoing field experiments.

We conducted the e-mail requests in two phases. In the initial wave 131 apparently valid e-mail addresses were contacted. We received 56 responses. We also sent out a second wave of 68 e-mails which consisted of additional authors identified from the initial wave of surveys and some corrected e-mail addresses. We received 19 responses to this second wave of e-mail surveys.

Overall, our search located more than 100 studies that included contrasts between white and non-white groups who were on-average equivalent in their labor-market relevant characteristics (e.g. education, experience level in the labor market, etc.) and who otherwise met our inclusion criterion.<sup>1</sup> Some of these studies included contrasts between more than one target group and whites (e.g. blacks and Hispanics), producing multiple estimates of discrimination against non-whites.

Finally, since this procedure was originally undertaken, we have added new studies to our sample based on a refreshed bibliographic and citation search in 2021 and reference searches of new studies located through bibliographic search.

<sup>1</sup> We excluded some studies where it was unclear if employers were making decisions producing discrepant outcomes because applications were made through an employment agency. We excluded a few other studies because they lacked basic information on counts of outcomes by target group and the authors could not be located or declined to provide these data when contacted.

*Coding:* We coded key characteristics of the studies into a database for our analysis. Coding was based on a coding rubric we developed, which listed the characteristics and included coding instructions. To ensure reliability, most studies in our analysis were coded independently by two raters. Studies were coded by readers fluent in the language of the study report, which included English, French, German, and Dutch. The coders were the authors of this study, plus colleagues (co-authors of previous publications using this data), and research assistants. We reconciled the results of the two codings, performing further investigations to find the correct answer on coding decisions in cases of disagreement. Further details of the coding procedures are discussed in SI ref. 1.

## Appendix B. Adjustment to Discrimination Ratios in Some Multi-Stage Studies

A few studies in our sample follow a multi-stage design in measuring discrimination. This was a study design used by some studies commissioned by the International Labor Organization. In these studies, applicants applied for advertised jobs in pairs, and the applicants first called employers by phone to inquire if a job was still available.

The complication we run into is the following: In five studies, if one applicant was told the job was available and the other was not, no application was submitted by *either* tester. The last aspect of this design – that when one applicant received a positive response and the other did not, the applicant who could have then submitted a resume did not – requires some adjustment. We want to capture callback rates for the non-white racial-ethnic applicants and white applicants from the point of initial application. We know that respondents who were told "no job is available" did not receive a callback. For situations where both applicants were told the job is still available or both were told it is not available, this is straightforward: we include these counts in calculating the rates of callbacks. However, when one pair member was told the job is available and the other was not, we do not know how often the pair member who was told the job was available would have received a callback if they had applied. We need to estimate this to get complete callback outcomes from the point of application.

To estimate callback rates in these studies, we assume that the member of the pair who received the invitation to interview but did not submit a resume (because their partner was told the job was no longer available) was as likely to get a callback if they had submitted a resume as applicants of the same race/ethnic group in the same study for which an application was submitted.

## Appendix C. Variances Estimation for Effect Sizes

For studies that are unpaired or do not report paired outcomes, the variance of the logged discrimination ratio for the  $m$ th non-white racial-ethnic group in the  $i$ th study for callbacks is estimated by:

$$\sigma_{ij}^2 = Var(\ln(y_{ij})) = \frac{1}{c_{ij}^w} - \frac{1}{n_{ij}^w} + \frac{1}{c_{ij}^m} - \frac{1}{n_{ij}^m}$$

This is Bornstein, Hedges, Higgins, and Rothstein's (3) formula 5.3. For studies that use a paired design – with one non-white and one white applicant applying for each job – and report paired outcomes, we use an alternative formula to account for the pairing from Zhou (2007). If  $p^a$  is the number of pairs in which both white and non-white testers receive a callback,  $p^b$  is the number of pairs in which the white tester received a callback but not the non-white,  $p^c$  is the number of pairs in which the non-white tester received a callback but not the white, and  $p^d$  is the number of pairs in which neither tester received a callback, then the variance of the logged discrimination ratio for the  $j$ th non-white group in the  $i$ th study with paired data is:

$$\sigma_{im}^2 = Var(\ln(y_{ij})) = \frac{p_{ij}^b + p_{ij}^c}{(p_{ij}^a + p_{ij}^b)(p_{ij}^a + p_{ij}^c)}$$

## Appendix D. Publication Bias

Publication bias results when studies that fail to find statistically significant effects are less likely to be published. If studies that find no statistically significant discrimination are less likely to be published, this will lead to overestimating discrimination in meta-analysis. See Borenstein et al. (3), chapter 30.

Our primary interest is change over time. The key question then becomes if the extent of publication bias has changed over time, which would confound the time trend. A constant level of publication bias would bias estimates of the level of discrimination upwards evenly across time but not change trend estimates.

We tried two methods to examine publication bias. First, we examined publication bias based on funnel plots and the trim-and-fill method (4) with the pooled data broken into three periods: before 2000, 2001-2010, and 2011 and later. Funnel plots are shown in Supporting Information Figure S3. The trim-and-fill analysis found no evidence of publication bias in any period – funnel plots are fairly symmetric and no points were found to be "missing" in any of the three periods based on the trim-and-fill analysis (estimated with "metafor" with default options).

Second, we used the PEESE procedure. PEESE readily accommodates moderators such as our year variables and country and group controls (5). This method uses a weighted regression with the variance of the effect as a predictor to capture publication bias.

Estimates of PEESE models are shown in Supporting Information Table S11. Models 3-4 allow for interaction of study year and variance, as suggested by Stanley and Doucouliagos (6). We find evidence of publication bias in some (but not all) models. Importantly, we never find that the slope of year is significantly changed by adjusting for publication bias, which is of primary significance for our analysis. Not do we find a significant interaction of variability and the slope of year in models including this interaction.

We note, however, that some simulation studies have found that the PEESE method works well when there is little residual variability but does not work well under "realistic" conditions of heterogeneity in population effects (7, 8).

In sum, neither the trim-and-fill by decade nor the PEESE finds evidence that publication bias is likely to affect the trend over time.

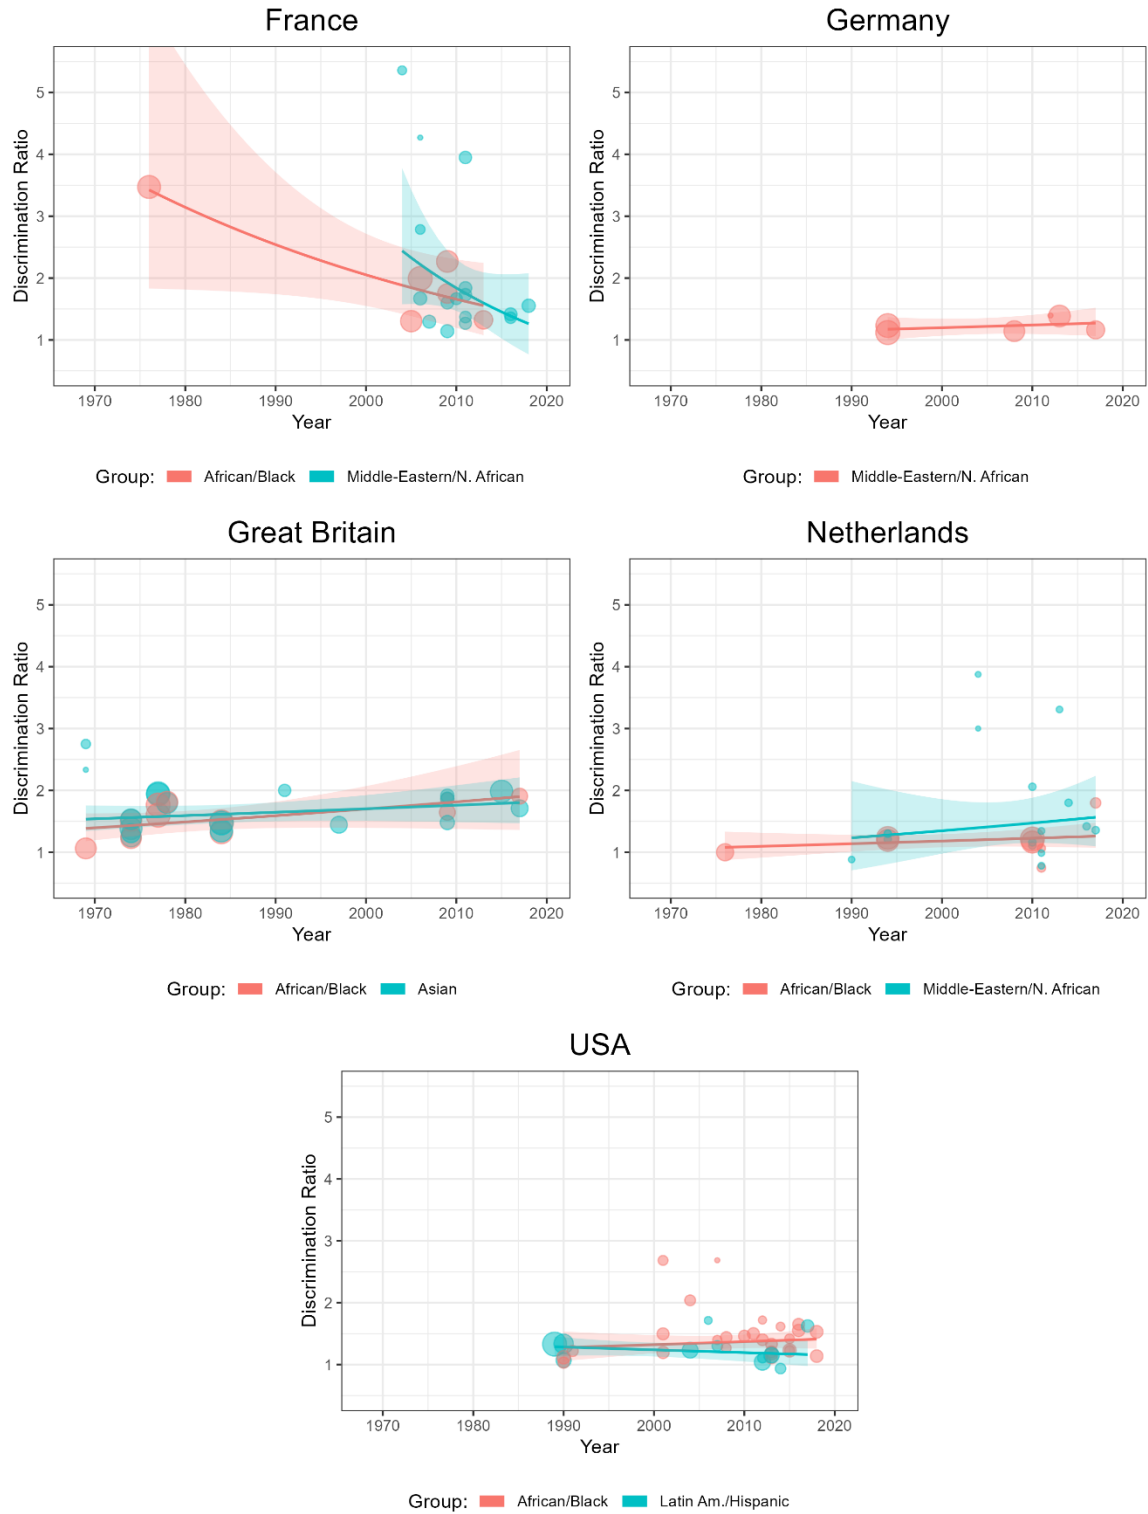

**Fig. S1.** Discrimination Ratios over Time by Country and Group

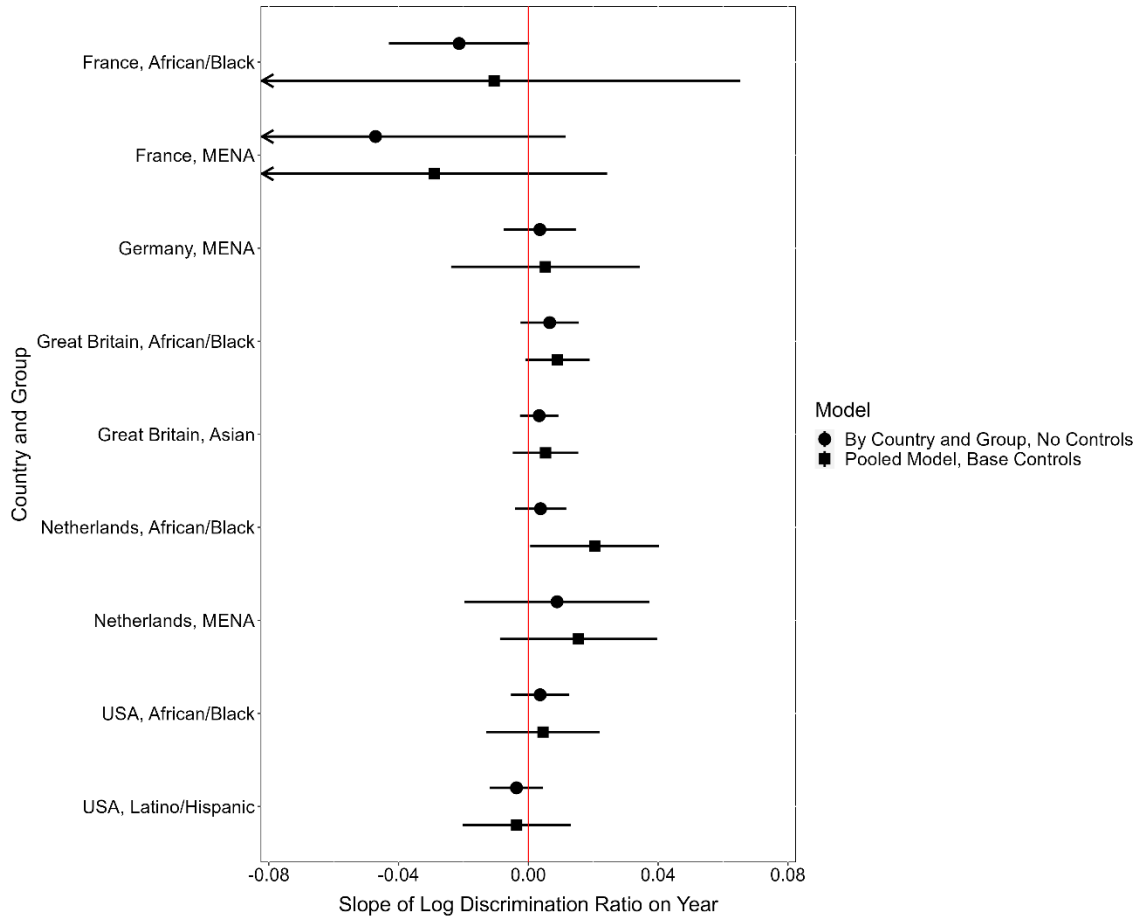

Notes: Dots represent the point estimates, lines the 95% confidence intervals. Arrows indicate that 95% CI exceeds plot limit. Model estimates shown in Table S6. Only country-group combinations with 5 or more studies. Canada omitted because no groups have five or more studies.

**Fig. S2.** Trends in Hiring Discrimination by Country and Group

Funnel plot, year 2000 and before:

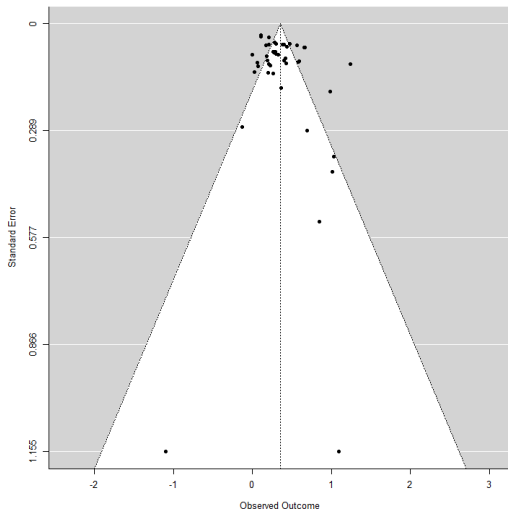

Funnel Plot 2001 to 2010:

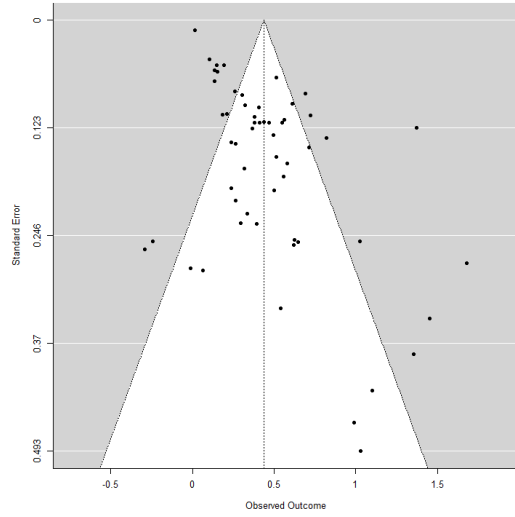

Funnel Plot 2011 and later:

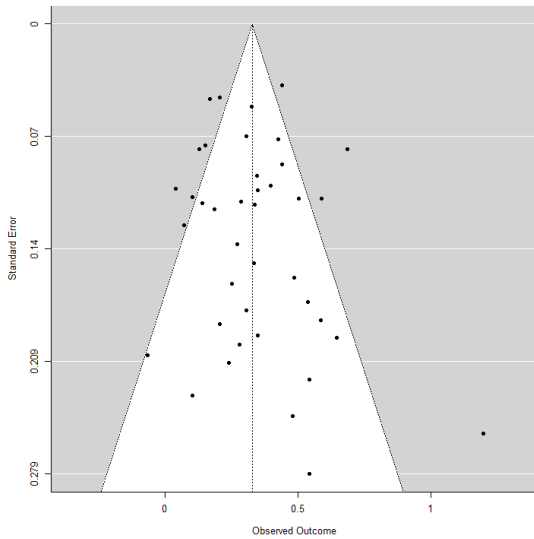

**Fig. S3.** Funnel Plots by Year Categories

**Table S1: Pooled Meta-Regression Estimates of Log Discrimination Ratio on Country, Target Group, and Controls**

| Variable                                                    | Linear Trend Only<br>(1) | Linear Trend Only, 1985-2019<br>(2) | Country + Group<br>(3) | Base Controls<br>(4) | Add Foreign Ed, Nationality<br>(5) | Add Local UE Rate + % Foreign-Born<br>(6) | Excluding single-occupation studies, base controls<br>(7) | Base Controls, Resume Audits Only<br>(8) |
|-------------------------------------------------------------|--------------------------|-------------------------------------|------------------------|----------------------|------------------------------------|-------------------------------------------|-----------------------------------------------------------|------------------------------------------|
| Year of Fieldwork<br>(Four Digit Year)                      | 0.0001<br>(0.0018)       | 0.0032<br>(0.0021)                  | 0.0024<br>(0.0019)     | 0.0037<br>(0.0043)   | 0.0051<br>(0.0048)                 | 0.0087<br>(0.0062)                        | 0.0008<br>(0.0059)                                        | 0.0061<br>(0.0047)                       |
| Dummy variable for countries<br>(6 countries)               | No                       | No                                  | Yes                    | Yes                  | Yes                                | Yes                                       | Yes                                                       | Yes                                      |
| Dummy variables for racial-ethnic groups<br>(4 groups)      | No                       | No                                  | Yes                    | Yes                  | Yes                                | Yes                                       | Yes                                                       | Yes                                      |
| Basic Study Controls (see Table 2)<br>(12 variables)        | No                       | No                                  | No                     | Yes                  | Yes                                | Yes                                       | Yes                                                       | Yes                                      |
| Controls for Foreign Educ. and Nationality<br>(4 variables) | No                       | No                                  | No                     | No                   | Yes                                | Yes                                       | No                                                        | No                                       |
| Controls for Unemployment<br>and % Foreign Born in Region   | No                       | No                                  | No                     | No                   | No                                 | Yes                                       | No                                                        | No                                       |
| N effects / N studies                                       | 140/90                   | 119 / 81                            | 140/90                 | 140/90               | 140/90                             | 113/72                                    | 119/72                                                    | 118 / 75                                 |
| Tau-squared, USA                                            | 0.014                    | 0.011                               | 0.017                  | 0.009                | 0.009                              | 0.011                                     | 0.010                                                     | 0.009                                    |
| Tau-squared, Canada                                         | 0.031                    | 0.036                               | 0.042                  | 0.140                | 0.153                              | 0.199                                     | 0.126                                                     | 0.066                                    |
| Tau-squared, France                                         | 0.224                    | 0.185                               | 0.159                  | 0.157                | 0.129                              | 0.157                                     | 0.085                                                     | 0.172                                    |
| Tau-squared, Germany                                        | 0.019                    | 0.012                               | 0.004                  | 0.020                | 0.024                              | 0.002                                     | 0.017                                                     | 0.030                                    |
| Tau-squared, Great Britain                                  | 0.036                    | 0.058                               | 0.013                  | 0.000                | 0.000                              | 0.002                                     | 0.001                                                     | 0.000                                    |
| Tau-squared, Netherlands                                    | 0.072                    | 0.059                               | 0.080                  | 0.145                | 0.143                              | 0.058                                     | 0.178                                                     | 0.165                                    |

Notes: +=p<.1; \* = p<.05; \*\* = p<.01; \*\*\* = p<.001. Two-tailed tests. Standard error in parentheses. All models use the "subgroup correlated effects" model of Pustejovsky and Tipton (2022). Robust standard errors clustered at the study level.

Base controls are variables shown in table 2: study method dummy, tester gender (2 dummies), applicant education (3 dummies), applicant occupation (3 dummies), immigrant status, job source online (2 dummies).



**Table S2: Pooled Meta-Regression Estimates of Log Discrimination Ratio on Country, Target Group, and Controls, Post-1984 Studies Only**

| Variable                                                    | Linear Trend Only<br>(1) | Country + Group<br>(2) | Base Controls<br>(3) | Add Foreign Ed, Nationality<br>(4) | Add Local UE Rate + % Foreign-Born<br>(5) | Excluding single-occupation studies, base controls<br>(6) | Base Controls, Resume Audits Only<br>(7) |
|-------------------------------------------------------------|--------------------------|------------------------|----------------------|------------------------------------|-------------------------------------------|-----------------------------------------------------------|------------------------------------------|
| Year of Fieldwork<br>(Four Digit Year)                      | 0.0032<br>(0.0021)       | 0.0019<br>(0.0025)     | -0.0008<br>(0.0083)  | -0.0009<br>(0.0086)                | 0.0099<br>(0.0095)                        | 0.0027<br>(0.0073)                                        | -0.0032<br>(0.0086)                      |
| Dummy variable for countries<br>(6 countries)               | No                       | Yes                    | Yes                  | Yes                                | Yes                                       | Yes                                                       | Yes                                      |
| Dummy variables for racial-ethnic groups<br>(4 groups)      | No                       | Yes                    | Yes                  | Yes                                | Yes                                       | Yes                                                       | Yes                                      |
| Basic Study Controls (see Table 2)<br>(12 variables)        | No                       | No                     | Yes                  | Yes                                | Yes                                       | Yes                                                       | Yes                                      |
| Controls for Foreign Educ. and Nationality<br>(4 variables) | No                       | No                     | No                   | Yes                                | Yes                                       | No                                                        | No                                       |
| Controls for Unemployment<br>and % Foreign Born in Region   | No                       | No                     | No                   | No                                 | Yes                                       | No                                                        | No                                       |
| N effects / N studies                                       | 119 / 81                 | 119 / 81               | 119 / 81             | 119 / 81                           | 94 / 65                                   | 100 / 64                                                  | 100 / 67                                 |
| Tau-squared, USA                                            | 0.011                    | 0.017                  | 0.009                | 0.019                              | 0.014                                     | 0.016                                                     | 0.006                                    |
| Tau-squared, Canada                                         | 0.036                    | 0.042                  | 0.141                | 0.129                              | 0.191                                     | 0.068                                                     | 0.086                                    |
| Tau-squared, France                                         | 0.185                    | 0.131                  | 0.139                | 0.132                              | 0.160                                     | 0.000                                                     | 0.140                                    |
| Tau-squared, Germany                                        | 0.012                    | 0.005                  | 0.015                | 0.003                              | 0.000                                     | 0.008                                                     | 0.027                                    |
| Tau-squared, Great Britain                                  | 0.058                    | 0.000                  | 0.000                | 0.000                              | 0.000                                     | 0.000                                                     | 0.000                                    |
| Tau-squared, Netherlands                                    | 0.059                    | 0.084                  | 0.162                | 0.107                              | 0.081                                     | 0.204                                                     | 0.181                                    |

Notes: +=p<.1; \* = p<.05; \*\* = p<.01; \*\*\* = p<.001. Two-tailed tests. Standard error in parentheses. All models use the "subgroup correlated effects" model of Pustejovsky and Tipton (2022). Robust standard errors clustered at the study level.

Basic study controls are variables shown in table 2: study method dummy, tester gender (2 dummies), applicant education (3 dummies), applicant occupation (3 dummies), immigrant status, job source online (2 dummies).

Model 1 is the same as model 2 in table S1.

**Table S3: Meta-Regression Estimates of the Trend in the Log Discrimination Ratio by Racial-Ethnic Group**

|                                                        | Models by Group         |                            |                      | Pooled Model with<br>Group-Specific Slopes | N effects /<br>N studies |
|--------------------------------------------------------|-------------------------|----------------------------|----------------------|--------------------------------------------|--------------------------|
|                                                        | Linear<br>Trend<br>Only | Add<br>Country<br>Controls | Add Base<br>Controls | Base Controls                              |                          |
|                                                        | (1)                     | (2)                        | (3)                  | (4)                                        |                          |
| <u>Linear Trends by Group</u>                          |                         |                            |                      |                                            |                          |
| African/Black, Year of Fieldwork<br>(Four Digit Year)  | -0.0012<br>(0.0029)     | 0.0023<br>(0.0044)         | -0.0034<br>(0.0048)  | 0.0082 +<br>(0.0047)                       | 57 / 51                  |
| MENA, Year of Fieldwork<br>(Four Digit Year)           | 0.0052<br>(0.0073)      | -0.0037<br>(0.0143)        | 0.0136<br>(0.0136)   | 0.0095<br>(0.0054)                         | 41 / 39                  |
| Latin/Hispanic, Year of Fieldwork<br>(Four Digit Year) | -0.0012<br>(0.0043)     | -0.0040<br>(0.0041)        | Insufficient<br>Data | 0.0000<br>(0.0061)                         | 12 / 12                  |
| Asian, Year of Fieldwork<br>(Four Digit Year)          | -0.0015<br>(0.0024)     | 0.0008<br>(0.0027)         | Insufficient<br>Data | 0.0032<br>(0.0043)                         | 30 / 21                  |
| <u>Trend Post-1984</u>                                 |                         |                            |                      |                                            |                          |
| African/Black, Year post -1984                         | 0.0020<br>(0.0035)      | 0.0102 *<br>(0.0041)       | 0.0067<br>(0.0058)   | 0.0050<br>(0.0090)                         | 47 / 42                  |
| Asian, Year post -1984                                 | -0.0007<br>(0.0026)     | -0.0027<br>(0.0029)        | Insufficient<br>Data | -0.0029<br>(0.0089)                        | 19 / 14                  |
| <u>Controls</u>                                        |                         |                            |                      |                                            |                          |
| Dummy variables for Country                            | No                      | Yes                        | Yes                  | Yes                                        |                          |
| Dummy for In-Person vs. Resume                         | No                      | Yes                        | Yes                  | Yes                                        |                          |
| Basic Study Controls                                   | No                      | No                         | Yes                  | Yes                                        |                          |

Notes: Columns 1-3 based on a separate random-effects meta-regression estimated for each racial-ethnic group. Column 4 based on a single model with country-specific year trends, base model controls, and country-specific Tau parameters. Tau parameters not shown. The base controls are twelve dummy variables shown in Table 2.

+ =  $p < .1$ ; \* =  $p < .05$ ; \*\* =  $p < .01$ ; \*\*\* =  $p < .001$ . Two-tailed tests. Standard error in parentheses. Robust standard errors clustered at the study level.

With the Bonjamini-Hochberg adjustment for multiple comparisons with four tests (see Materials & Methods) no tests are significant.

**Table S4: Meta-Regression Estimates of Decade Changes in Log Discrimination Ratio, MENA and Muslim-Origin Minority Groups**

| Variable                                            | Subsample: MENA           |                    |                       | Subsample: Muslim-Majority Origin Country |                      |                        |
|-----------------------------------------------------|---------------------------|--------------------|-----------------------|-------------------------------------------|----------------------|------------------------|
|                                                     | Period<br>Dummies<br>Only | + Country          | + Base<br>Controls    | Period<br>Dummies<br>Only                 | Country +<br>Group   | + Base<br>Controls     |
|                                                     | (1)                       | (2)                | (3)                   | (4)                                       | (5)                  | (6)                    |
| <u>Period Dummies (Reference = 2000 or earlier)</u> |                           |                    |                       |                                           |                      |                        |
| Year 2001 to 2011                                   | 0.3351 *<br>(0.1072)      | 0.0510<br>(0.1113) | 0.9672 **<br>(0.2345) | 0.1927<br>(0.1125)                        | 0.0399<br>(0.0919)   | 0.7783 **<br>(0.1395)  |
| Year After 2011                                     | 0.2417 *<br>(0.0773)      | 0.1146<br>(0.0761) | 0.8936 **<br>(0.2361) | 0.1333<br>(0.0767)                        | 0.1306 +<br>(0.0579) | 1.0677 ***<br>(0.1690) |
| Dummy variable for country<br>(6 countries)         | No                        | Yes                | Yes                   | No                                        | Yes                  | Yes                    |
| Dummy vars. for racial-ethnic groups<br>(4 groups)  | No                        | No                 | No                    | No                                        | Yes                  | Yes                    |
| Basic Study Controls                                | No                        | No                 | Yes                   | No                                        | No                   | Yes                    |
| N effects / N studies                               | 41 / 39                   | 41 / 39            | 41 / 39               | 57 / 51                                   | 57 / 51              | 57 / 51                |
| Tau-squared, USA                                    | 0.053                     | 0.022              | 0.011                 | 0.000                                     | 0.000                | 0.000                  |
| Tau-squared, Canada                                 | 0.126                     | 0.107              | 0.628                 | 0.076                                     | 0.064                | 0.328                  |
| Tau-squared, France                                 | 0.145                     | 0.161              | 0.000                 | 0.134                                     | 0.155                | 0.014                  |
| Tau-squared, Germany                                | 0.040                     | 0.005              | 0.033                 | 0.042                                     | 0.003                | 0.010                  |
| Tau-squared, Great Britain                          | 0.000                     | 0.022              | 0.011                 | 0.045                                     | 0.020                | 0.000                  |
| Tau-squared, Netherlands                            | 0.085                     | 0.091              | 0.083                 | 0.082                                     | 0.091                | 0.138                  |

Notes: +=p<.1; \* = p<.05; \*\* = p<.01; \*\*\* = p<.001. Two-tailed tests. Standard error in parentheses. Robust standard errors clustered at the study level.

Model 1 to 3 include only Middle-East North Africa (MENA) ethnic groups. Model 4 to 6 include all ethnic groups with origins in Muslim-majority countries.

Basic study controls are shown in Table 2.

**Table S5: Meta-Regression Estimates of Linear Trend in Log Discrimination Ratio by Country**

| Variable                                                             | Linear Trend<br>Only, Models by<br>Country<br>(1) | Group Controls,<br>Models by<br>Country<br>(2) | Pooled Model, Country-<br>Specific Slopes, Base<br>Controls<br>(3) | N effects / studies |
|----------------------------------------------------------------------|---------------------------------------------------|------------------------------------------------|--------------------------------------------------------------------|---------------------|
| <u>Linear Trend by Country (Slope of Year of Fieldwork Variable)</u> |                                                   |                                                |                                                                    |                     |
| Canada                                                               | -0.0030<br>(0.0050)                               | 0.0007<br>(0.0046)                             | -0.0095<br>(0.0170)                                                | 14 / 7              |
| France                                                               | -0.0228 <sup>***, †</sup><br>(0.0044)             | -0.0260 <sup>**</sup> , †<br>(0.0069)          | -0.0195 <sup>+, ns</sup><br>(0.0055)                               | 23 / 20             |
| Germany                                                              | 0.0023<br>(0.0032)                                | 0.0035<br>(0.0052)                             | 0.0072<br>(0.0119)                                                 | 8 / 6               |
| Great Britain                                                        | 0.0046 <sup>*</sup> , †<br>(0.0018)               | 0.0044 <sup>+, ns</sup><br>(0.0021)            | 0.0042<br>(0.0042)                                                 | 30 / 12             |
| Netherlands                                                          | 0.0081 <sup>+, ns</sup><br>(0.0045)               | 0.0063<br>(0.0059)                             | 0.0188 <sup>*</sup> , ns<br>(0.0067)                               | 25 / 15             |
| USA                                                                  | 0.0028<br>(0.0031)                                | 0.0016<br>(0.0039)                             | 0.0017<br>(0.0075)                                                 | 40 / 30             |
| <u>Trend Post-1984</u>                                               |                                                   |                                                |                                                                    |                     |
| Great Britain post-1984                                              | 0.0082 <sup>+</sup><br>(0.0027)                   | 0.0090<br>(0.0054)                             | -0.0065<br>(0.0122)                                                | 11 / 5              |
| France post-1984                                                     | -0.0344<br>(0.0217)                               | -0.0401<br>(0.0237)                            | -0.0289<br>(0.0255)                                                | 22 / 19             |
| Netherlands post-1984                                                | 0.0074<br>(0.0060)                                | 0.0064<br>(0.0081)                             | 0.0205<br>(0.0122)                                                 | 24 / 14             |
| <u>Model Controls</u>                                                |                                                   |                                                |                                                                    |                     |
| Dummy variables for race-ethnic group                                | No                                                | Yes                                            | Yes                                                                |                     |
| Base Controls                                                        | No                                                | No                                             | Yes                                                                |                     |

Notes: Models 1 and 2 based on separate random-effects meta-regression for each country. Model 1 only includes a linear year predictor, model 2 adds controls for group. Model 3 is a single pooled model with country-specific slopes, base controls, and country-specific tau parameters.

+ =  $p < .1$ ; \* =  $p < .05$ ; \*\* =  $p < .01$ ; \*\*\* =  $p < .001$ . Two-tailed tests, no multiple-comparison adjustment. Standard error in parentheses. Robust standard errors clustered at the study level.

† = Benjamini-Hochberg multiple comparison adjusted test significant with 6 tests, ns = not significant after adjustment.

**Table S6: Meta-Regression Estimates of Linear Trend in Log Discrimination Ratio by Country and Group**

| Country and Group                            | (1)                                              | (2)                                                       | N effects / N studies |
|----------------------------------------------|--------------------------------------------------|-----------------------------------------------------------|-----------------------|
|                                              | Trend from Meta-Regressions by Country and Group | Country-Group Specific Trend, Pooled Model, Base Controls |                       |
| USA, African/Black                           | 0.0036<br>(0.0044)                               | 0.0045<br>(0.0084)                                        | 27 / 27               |
| USA, Latin Am./ Hispanic                     | -0.0037<br>(0.0036)                              | -0.0036<br>(0.0079)                                       | 11 / 11               |
| France, African/Black                        | -0.0213 +<br>(0.0078)                            | -0.0105<br>(0.0116)                                       | 6 / 6                 |
| France, MENA                                 | -0.0471<br>(0.0273)                              | -0.0290<br>(0.0232)                                       | 16 / 16               |
| Germany, MENA                                | 0.0035<br>(0.0040)                               | 0.0053<br>(0.0125)                                        | 6 / 6                 |
| Great Britain, African/Black                 | 0.0066<br>(0.0040)                               | 0.0090 +<br>(0.0045)                                      | 11 / 11               |
| Great Britain, Asian                         | 0.0033<br>(0.0028)                               | 0.0053<br>(0.0048)                                        | 18 / 18               |
| Netherlands, African/Black                   | 0.0038<br>(0.0032)                               | 0.0204 *<br>(0.0076)                                      | 8 / 8                 |
| Netherlands, MENA                            | 0.0088<br>(0.0132)                               | 0.0155<br>(0.0109)                                        | 15 / 15               |
| <u>Trend Dropping Early Study for France</u> |                                                  |                                                           |                       |
| France, African/Black, post-1984             | -0.0075<br>(0.0485)                              | 0.0017<br>(0.0596)                                        | 5 / 5                 |
| Great Britain, African/Black post-1984       | 0.0129<br>(0.0117)                               | -0.0014<br>(0.0145)                                       | 3 / 3                 |
| Great Britain, Asian post-1984               | 0.0088<br>(0.0061)                               | -0.0092<br>(0.0137)                                       | 7 / 7                 |
| Netherlands, African/Black post-1984         | 0.0001<br>(0.0044)                               | 0.0263 *<br>(0.0113)                                      | 7 / 7                 |

Notes: +=p<.1; \* = p<.05; \*\* = p<.01; \*\*\* = p<.001. Two-tailed tests. Standard error in parentheses. Robust standard errors clustered at the study level. In model 1, each year coefficient is estimated in a separate meta-regression with year of fieldwork as the only predictor. Model 2 is subgroup correlated effect model including base controls. With the Bonjamini-Hochberg adjustment for multiple comparisons with 10 tests, (see Materials & Methods) no tests are significant.

**Table S7: Descriptive Statistics, Predictor Variables****Base Model Variables**

| <u>Annual Trend</u>                                                       | <u>Mean</u>    | <u>Std. Dev.</u> | N (effects / studies) |
|---------------------------------------------------------------------------|----------------|------------------|-----------------------|
| Year of Fieldwork                                                         | 2002.6         | 14.0             | 140 / 90              |
| <b>Study Method</b>                                                       |                |                  |                       |
|                                                                           | <u>Effects</u> | <u>Studies</u>   |                       |
| Resume Audit / Correspondence                                             | 118            | 75               |                       |
| In-person Audit                                                           | 22             | 15               |                       |
| <b>Tester Gender</b>                                                      |                |                  |                       |
|                                                                           | <u>Effects</u> | <u>Studies</u>   |                       |
| Testers Male Only                                                         | 43             | 37               |                       |
| Testers Female Only                                                       | 9              | 9                |                       |
| Testers Both Male and Female                                              | 88             | 46               |                       |
| <b>Applicant Education (most common level)</b>                            |                |                  |                       |
|                                                                           | <u>Effects</u> | <u>Studies</u>   |                       |
| High School or Less                                                       | 55             | 39               |                       |
| Some College or Post-HS Vocational Degree                                 | 34             | 23               |                       |
| College or More                                                           | 30             | 20               |                       |
| Education information missing                                             | 21             | 8                |                       |
| <b>Occupation Controls (all that apply)</b>                               |                |                  |                       |
|                                                                           | <u>Effects</u> | <u>Studies</u>   |                       |
| Includes Blue Collar Jobs (1=yes)                                         | 69             | 41               |                       |
| Includes Jobs with Customer Contact (1=yes)                               | 100            | 64               |                       |
| Includes Jobs with an Office Focus (1=yes)                                | 104            | 64               |                       |
| <b>Job Source</b>                                                         |                |                  |                       |
|                                                                           | <u>Effects</u> | <u>Studies</u>   |                       |
| Online                                                                    | 72             | 46               |                       |
| Offline                                                                   | 50             | 32               |                       |
| Both Online and Offline                                                   | 18             | 12               |                       |
| <b>Minority Group Includes Foreign-Born Persons?</b>                      |                |                  |                       |
|                                                                           | <u>Effects</u> | <u>Studies</u>   |                       |
| Native-Born Only                                                          | 97             | 70               |                       |
| Includes Foreign-Born                                                     | 43             | 22               |                       |
| <b>Additional Controls (used in some models in Table S1 and Figure 2)</b> |                |                  |                       |
| <b>Nationality</b>                                                        |                |                  |                       |
|                                                                           | <u>Effects</u> | <u>Studies</u>   |                       |
| Non-white Applicants Citizens of Host Nation                              | 134            | 86               |                       |
| Non-white Applicants Not Citizens of Host Nation                          | 4              | 3                |                       |
| Non-white Applicants Mix of Citizens/Noncitizens                          | 2              | 2                |                       |
| <b>Non-White Applicant Highest Ed. Credential Foreign?</b>                |                |                  |                       |
|                                                                           | <u>Effects</u> | <u>Studies</u>   |                       |
| Domestic Highest Education Credential                                     | 123            | 84               |                       |
| Foreign Highest Education Credential                                      | 1              | 1                |                       |
| Highest Credential Mix of Foreign/Domestic                                | 16             | 7                |                       |
| <b>Contextual Controls</b>                                                |                |                  |                       |
|                                                                           | <u>Mean</u>    | <u>Std. Dev.</u> | N (effects / studies) |
| Unemployment Rate of Local City/Region                                    | 7.0%           | 2.4%             | 115 / 74              |
| Percentage Immigrants in Local City/Region                                | 13.4%          | 10.9%            | 115 / 73              |

Notes: Effects are distinct estimates of discrimination against minority groups. Some studies include discrimination estimates against multiple minority groups. Studies do not always sum to 90 because an effect can have different values for the same study.

**Table S8: Specific Minority Groups in Field Experiments by Country**

| <b><u>Country</u></b> | <b><u>Non-White Groups with Effect Sizes (Study Term)</u></b>                                                                |
|-----------------------|------------------------------------------------------------------------------------------------------------------------------|
| Canada                | African, Arab, Black, Chinese, Indian, Indo-Pakistani, Latino, Middle Eastern, West Indian                                   |
| France                | African, Antillean, Asian, Franco-North African, Moroccan, North African, Senegalese, Sub-Saharan African, Vietnamese        |
| Germany               | MENA, Turkish, Southeast Asian, Sub-Saharan African                                                                          |
| Great Britain         | African, Asian (South Asian), Black African, Black Caribbean, Chinese, Indian, Pakistani, Pakistani/Bangladeshi, West Indian |
| Netherlands           | Antillean, Arab, Black Surinamer, Hindustani, Moroccan, Spanish, Surinamese, Turkish                                         |
| US                    | African American, Arab American, Asian, Black, Hispanic, Latino, Somali                                                      |

**Table S9: Pooled Meta-Regression of Log Discrimination Ratio on Year, Non-Linearity Analysis**

| Variable                                                  | Period<br>Dummies<br>Only<br><u>1</u> | Country +<br>Group<br><u>2</u> | Base<br>Controls<br><u>3</u> | Squared<br>Year<br>Predictor<br><u>4</u> |
|-----------------------------------------------------------|---------------------------------------|--------------------------------|------------------------------|------------------------------------------|
| <u>Period Dummy Variables (Reference=Before 1991)</u>     |                                       |                                |                              |                                          |
| Year 1991 to 2000 (1=yes)                                 | 0.0218<br>(0.0656)                    | -0.0089<br>(0.0810)            | -0.0436<br>(0.0797)          |                                          |
| Year 2001 to 2010 (1=yes)                                 | 0.1765 *<br>(0.0677)                  | 0.1316<br>(0.0823)             | 0.2233<br>(0.1273)           |                                          |
| Year After 2010 (1=yes)                                   | 0.1014 +<br>(0.0530)                  | 0.0731<br>(0.0731)             | 0.2232<br>(0.1402)           |                                          |
| Year as Continuous Variable with Squared Term             |                                       |                                |                              |                                          |
| Year (Year 2000=0)                                        |                                       |                                |                              | 0.0013<br>(0.0057)                       |
| Year Squared (Year 2000=0)                                |                                       |                                |                              | -0.0002<br>(0.0004)                      |
| Dummy variable for country<br>(6 countries)               | No                                    | Yes                            | Yes                          | Yes                                      |
| Dummy variables for minority group<br>(4 minority groups) | No                                    | Yes                            | Yes                          | Yes                                      |
| Basic Study Controls<br>(12 variables)                    | No                                    | No                             | Yes                          | Yes                                      |
| N effects / N studies                                     | 140/90                                | 140/90                         | 140/90                       | 140/90                                   |
| Tau-squared, USA                                          | 0.0077                                | 0.0158                         | 0.0097                       | 0.0079                                   |
| Tau-squared, Canada                                       | 0.0700                                | 0.0596                         | 0.1387                       | 0.1380                                   |
| Tau-squared, France                                       | 0.1624                                | 0.1588                         | 0.1541                       | 0.1674                                   |
| Tau-squared, Germany                                      | 0.0100                                | 0.0096                         | 0.0160                       | 0.0228                                   |
| Tau-squared, Great Britain                                | 0.0122                                | 0.0131                         | 0.0000                       | 0.0000                                   |
| Tau-squared, Netherlands                                  | 0.0611                                | 0.0727                         | 0.1219                       | 0.1488                                   |

Notes: +=p<.1; \* = p<.05; \*\* = p<.01; \*\*\* = p<.001. Two-tailed tests. Standard error in parentheses. Standard errors clustered at the study level.

Basic study controls are shown in Table 2.



**Table S10: Random-Effects Meta-Regression Models with Odds-Ratio Outcome, Pooled Models with Base Controls**

| <u>Variables in Model</u>                                 | <u>Single Trend</u> | <u>Country-Specific Trends</u>       | <u>Group-Specific Trends</u>          | <u>MENA Trends</u>                       |
|-----------------------------------------------------------|---------------------|--------------------------------------|---------------------------------------|------------------------------------------|
| Linear Trend Coef(s)<br>(Slope of Year)                   | -0.0089<br>(0.0077) | Canada<br>-0.0281<br>(0.0170)        | African/Black<br>-0.0034<br>(0.0082)  | Year 2000 or Earlier (ref.)              |
|                                                           |                     | France<br>-0.0268<br>(0.0074)        | + MENA<br>-0.0012<br>(0.0101)         | Year 2001 to 2011 1.1066 **<br>(0.3047)  |
|                                                           |                     | Germany<br>0.0116<br>(0.0151)        | Latin/Hispanic<br>-0.0150<br>(0.0093) | Year 2012 or Later 1.0605 **<br>(0.2976) |
|                                                           |                     | Great Britain<br>-0.0118<br>(0.0081) | Asian<br>-0.0108<br>(0.0083)          |                                          |
|                                                           |                     | Netherlands<br>0.0287 *<br>(0.0096)  |                                       |                                          |
|                                                           |                     | USA<br>0.0003<br>(0.0120)            |                                       |                                          |
| <u>Control Variables</u>                                  |                     |                                      |                                       |                                          |
| Dummy variables for country<br>(6 countries)              | Yes                 | Yes                                  | Yes                                   | Yes                                      |
| Dummy variables for minority group<br>(4 minority groups) | Yes                 | Yes                                  | Yes                                   | Yes                                      |
| Basic Study Controls<br>(12 variables, see Table 2)       | Yes                 | Yes                                  | Yes                                   | Yes                                      |
| <u>Variance Structure</u>                                 |                     |                                      |                                       |                                          |
| Country-Specific Tau's                                    | Yes                 | Yes                                  | Yes                                   | Yes                                      |
| N effects / N studies                                     | 140 / 90            | 140 / 90                             | 140 / 90                              | 41 / 39                                  |

Notes: +=p<.1; \* = p<.05; \*\* = p<.01; \*\*\* = p<.001. Two-tailed tests. Standard error in parentheses. Standard errors clustered at the study level. The models are pooled subgroup correlated effects models. Basic study controls are shown in Table 2.

**Table S11: Publication Bias (PEESE) Estimates of Pooled Models**

| Variable                                                  | Linear<br>Trend<br>Only | + Base<br>Controls    | Linear<br>Trend<br>Only | + Base<br>Controls   |
|-----------------------------------------------------------|-------------------------|-----------------------|-------------------------|----------------------|
|                                                           | (1)                     | (2)                   | (3)                     | (4)                  |
| Year of Fieldwork (Four Digit Year)                       | -0.0047<br>(0.0041)     | 0.0070<br>(0.0040)    | -0.0066<br>(0.0047)     | 0.0055<br>(0.0043)   |
| Estimated Variance of Effect                              | 4.3055<br>(1.8687)      | 2.2296 **<br>(0.6456) | 5.7208<br>(2.4717)      | 2.9894 *<br>(0.9439) |
| Year * Variance                                           |                         |                       | 0.2704<br>(0.1480)      | 0.1107<br>(0.0618)   |
| Dummy variable for country<br>(6 countries)               | No                      | Yes                   | No                      | Yes                  |
| Dummy variables for minority group<br>(4 minority groups) | No                      | Yes                   | No                      | Yes                  |
| Basic Study Controls<br>(9 variables)                     | No                      | Yes                   | No                      | Yes                  |
| N effects / N studies                                     | 140 / 90                | 140 / 90              | 140 / 90                | 140 / 90             |

Notes: +=p<.1; \* = p<.05; \*\* = p<.01; \*\*\* = p<.001. Two-tailed tests. Standard error in parentheses. Robust standard errors clustered at the study level.

Basic study controls are dummies for year and minority group plus twelve variables shown in Table 2.

## SI References

1. L. Quillian, *et al.*, Do Some Countries Discriminate More than Others? Evidence from 97 Field Experiments of Racial Discrimination in Hiring. *Sociol. Sci.* **6**, 467–496 (2019).
2. L. Quillian, D. Pager, O. Hexel, A. H. Midtbøen, Meta-analysis of field experiments shows no change in racial discrimination in hiring over time. *Proc. Natl. Acad. Sci. USA* **114**, 10870–10875 (2017).
3. M. Borenstein, L. V. Hedges, J. P. T. Higgins, H. R. Rothstein, *Introduction to Meta-Analysis* (John Wiley & Sons, 2009).
4. G. Y. Zou, One relative risk versus two odds ratios: implications for meta-analyses involving paired and unpaired binary data. *Clin. Trials* **4**, 25–31 (2007).
5. S. Duval, R. Tweedie, A Nonparametric “Trim and Fill” Method of Accounting for Publication Bias in Meta-Analysis. *J. Am. Stat. Assoc.* **95**, 89–98 (2000).
6. T. D. Stanley, H. Doucouliagos, *Meta-Regression Analysis in Economics and Business*, 1st Ed. (Routledge, 2012).
7. N. Alinaghi, W. R. Reed, Meta-analysis and publication bias: How well does the FAT-PET-PEESE procedure work? *Res. Synth. Methods* **9**, 285–311 (2018).
8. S. Hong, Meta-analysis and publication bias: How well does the FAT-PET-PEESE procedure work? A replication study of Alinaghi & Reed (Research Synthesis Methods, 2018). *International Journal for Re-Views in Empirical Economics (IREE)* **3**, 1–22 (2019).
